# Supplementary material for: Anterior-posterior gene expression differences in three Lake Malawi cichlid fishes with variation in body stripe orientation
Source: PeerJ. 2017 Nov 17;5:e4080. doi: 10.7717/peerj.4080 (PMC5695249; doi:10.7717/peerj.4080)
Supplement: Table S2 [file peerj-05-4080-s005.xlsx]

## Sheet: coexpressed candidates
		Genes tested in the first set of candidates
		Genes tested in the second set of candidates
		Genes not annotated in East African cichlid transcriptomes
		Genes with undetectable expression level in the skin samples
	Top pmel coexpressed genes in zebrafish								Top fbxw4 coexpressed genes in zebrafish								Top sdf1 coexpressed genes in human, mouse and chicken
	The lower MR values indicate stronger expression correlation								The lower MR values indicate stronger expression correlation in zebrafish								The lower MR values indicate stronger expression correlation
First set of candidates	Rank	Gene	Function	Gene ID	Supportability	MR values			Rank	Gene	Function	Gene ID	Supportability	MR values			Rank	Gene	Function	Gene ID	Supportability	MR values Human	MR values Mouse	MR values Chiken
	1	rpe65a	retinal pigment epithelium-specific protein 65a	393724	1	10.5			1	tmem237b	transmembrane protein 237b	447898	1	54.2			1	OLFML3	olfactomedin-like 3	56944	3	2	97.8	37.4
	2	vsx1	visual system homeobox 1 homolog, chx10-like	30598	1	30			2	rx3	retinal homeobox gene 3	30474	1	81			2	PPAP2B	phosphatidic acid phosphatase type 2B	8613	3	11.4	132	31.4
	3	pax6a	paired box 6a	30567	2	31.6			3	ttc8	tetratricopeptide repeat domain 8	678551	1	97.1			3	PDGFRA	platelet-derived growth factor receptor, alpha polypeptide	5156	3	5.8	73	81.8
	4	mybl1	v-myb avian myeloblastosis viral oncogene homolog-like 1	558540	1	49.4			4	agpat3	1-acylglycerol-3-phosphate O-acyltransferase 3	406734	1	107.3			4	COL14A1	collagen, type XIV, alpha 1	7373	3	22.4	128.1	67
	5	neurod4	neuronal differentiation 4	266958	1	49.6			5	xpnpep1	X-prolyl aminopeptidase (aminopeptidase P) 1, soluble	406253	1	120.3			5	FBN1	fibrillin 1	2200	3	34.5	68.4	97.2
	6	rlbp1a	retinaldehyde binding protein 1a	393678	1	51.4			6	rnpc3	RNA-binding region (RNP1, RRM) containing 3	565672	1	128.5			6	ZCCHC24	zinc finger, CCHC domain containing 24	219654	3	71.4	112	49.9
	7	neurod1	neuronal differentiation 1	30169	1	54			7	nub1	negative regulator of ubiquitin-like proteins 1	557021	1	135.9			7	PRRX1	paired related homeobox 1	5396	3	27.5	120.6	154.4
	8	tbr1b	T-box, brain, 1b	58042	1	58.3			8	ift52	intraflagellar transport 52 homolog (Chlamydomonas)	414931	2	180.4			8	FSTL1	follistatin-like 1	11167	3	80.2	13.7	73.3
	Genes coexpressed with pmel and rpe65a in zebrafish								Genes coexpressed with fbxw4 and agpat3 in zebrafish								Genes coexpressed with col14a1a in zebrafish
	The lower MR values indicate stronger expression correlation								The lower MR values indicate stronger expression correlation in zebrafish								The lower MR values indicate stronger expression correlation
Second set of candidates	Rank	Symbol	Gene	Enterz ID	pmel MR values	rpe65a MR values	Average MR		Rank	Symbol	Gene	Enterz ID	fbxw4 MR values	agpat3 MR values	Average MR		Rank	Symbol	Gene	Enterz ID	Supportability	MR values zebrafish
	1	rlbp1a	retinaldehyde binding protein 1a	393678	51.4	14.8	33.1		1	dhdh	zgc:101723/trans-1,2-dihydrobenzene-1,2-diol dehydrogenase	449558	171.1	197.1	184.1		1	gli3	GLI family zinc finger 3	403042	1	5.3
	2	nr2e3	nuclear receptor subfamily 2, group E, member 3	492496	122.6	15.9	69.25		2	etfdh	electron-transferring-flavoprotein dehydrogenase	447859	454.8	8.3	231.55		2	dlx5a	distal-less homeobox 5a	30569	1	8.5
	3	isl1	ISL LIM homeobox 1	30147	64.5	108.5	86.5		3	zgc:73329	zgc:73329	393764	441.8	74.9	258.35		3	msxd	muscle segment homeobox D	30531	1	9.5
	4	vsx1	visual system homeobox 1 homolog, chx10-like	30598	30	155.2	92.6		4	gpx1a	glutathione peroxidase 1a	352926	272.8	279.5	276.15		4	dlx1a	distal-less homeobox 1a	30568	1	17.3
	5	neurod4	neuronal differentiation 4	266958	49.6	165.8	107.7		5	selenbp1	selenium binding protein 1	393542	512.6	96.7	304.65		5	flt4	fms-related tyrosine kinase 4	30121	1	19.1
	6	pax6a	paired box 6a	30567	31.6	224.3	127.95		6	ndufv3	NADH dehydrogenase (ubiquinone) flavoprotein 3	797946	525.4	179.2	352.3		6	hoxa11b	homeobox A11b	30382	3	27.4
	7	cryba4	crystallin, beta A4	553178	62	214.3	138.15		7	zgc:154045	zgc:154045	767727	634	249.3	441.65		7	ifitm5	interferon induced transmembrane protein 5	100005237	1	33.9
	8	neurod1	neuronal differentiation 1	30169	54	225.8	139.9		8	atp5g3a	ATP synthase, H+ transporting, mitochondrial Fo complex, subunit C3 (subunit 9), genome duplicate a	394151	815.7	119.1	467.4		8	cpxm1a	carboxypeptidase X (M14 family), member 1a/si:dkey-19p15.7	564830	1	34.9
	9	arr3a	arrestin 3a, retinal (X-arrestin)	436678	327.9	4.6	166.25		9	hsdl2	hydroxysteroid dehydrogenase like 2	322347	880.7	66.5	473.6		9	bmp4	bone morphogenetic protein 4	30612	1	43
	10	sncb	synuclein, beta	393944	158.1	180.3	169.2		10	bckdhb	branched chain keto acid dehydrogenase E1, beta polypeptide	569980	809.1	232.3	520.7
	11	si:ch211-251b21.1	si:ch211-251b21.1	571720	110.5	255.5	183		11	ndufb8	NADH dehydrogenase (ubiquinone) 1 beta subcomplex, 8	393829	880.7	254.7	567.7
	12	hmp19	HMP19 protein	324971	139.4	229.5	184.45
	13	celf3a	cugbp, Elav-like family member 3a	57922	106.7	270.8	188.75
	14	bhlhe22	basic helix-loop-helix family, member e22	393930	153.2	271.9	212.55
