# Supplementary material for: Anterior-posterior gene expression differences in three Lake Malawi cichlid fishes with variation in body stripe orientation
Source: PeerJ. 2017 Nov 17;5:e4080. doi: 10.7717/peerj.4080 (PMC5695249; doi:10.7717/peerj.4080)
Supplement: Table S4 [file peerj-05-4080-s007.xlsx]

## Sheet: Cq reference genes
	Aristochromis christyi							Buccochromis rhoadesii							Melanochromis auratus
		Cq average							Cq average							Cq average
	gapdh	20.6321						gapdh	21.9719						actb1	23.4531
	actb1	22.5946						actb1	22.7407						gapdh	24.441
	rps11	24.6809						rps11	25.0503						rps11	26.1937
	rps18	25.2876						rps18	25.5043						rps18	26.4099
	hsp90ab1	27.1986						hsp90ab1	27.0404						hsp90ab1	28.226
	hprt1	32.5298						hprt1	32.7732						hprt1	34.9006
	rps18	rps11	actb1	hprt1	gapdh	hsp90ab1		rps18	rps11	actb1	hprt1	gapdh	hsp90ab1		rps18	rps11	actb1	hprt1	gapdh	hsp90ab1
Ad_R1	25.7924	24.7432	23.4196	32.4824	20.1078	28.231		26.5098	25.9776	23.4875	35.3403	22.8049	28.671		25.3461	25.1171	22.6751	32.9175	26.1189	26.7688
Am_R1	24.3493	23.5182	21.3887	30.8295	19.2167	26.1211		25.5244	25.1456	22.5819	31.6779	21.7331	27.3201		25.618	24.9229	23.0792	33.7407	24.9976	27.0486
Av_R1	23.5784	22.7891	20.9021	30.8106	18.4506	25.0621		26.2016	25.6491	23.2294	33.1084	21.639	28.2232		26.3302	26.517	24.6071	34.7034	25.8893	28.3718
Pd_R1	26.2214	26.0246	23.9189	34.2482	20.3311	29.0086		26.4593	25.7147	23.6995	34.4752	22.6962	28.3803		27.137	27.6721	25.3805	35.7034	29.2743	29.3718
Pm_R1	25.2482	24.8424	22.7483	31.7296	20.3744	27.3923		26.1014	26.0043	23.1377	32.2645	22.7547	28.7088		25.3858	24.8637	23.0375	33.5034	28.5292	27.3718
Pv_R1	25.2626	24.7717	23.2157	33.2477	20.2957	27.8919		26.0904	25.6797	23.0657	32.6726	21.7917	28.1505		24.4289	24.3458	21.9977	32.9499	26.1439	26.2285
Ad_R2	26.4542	25.9079	23.6588	33.2478	19.8531	28.0925		25.453	24.9639	22.9913	32.8261	21.3106	27.9258		27.5231	27.2572	24.0093	35.0368	24.4897	30.0248
Am_R2	25.4883	24.8338	22.8656	32.7981	19.7312	27.1945		24.7873	24.3672	22.226	31.4207	20.6258	26.3893		26.9382	26.4911	23.5659	34.2368	24.3562	28.7955
Av_R2	25.1992	24.5742	22.7876	32.1801	20.064	26.4485		25.1028	24.7888	22.4715	32.3948	20.4145	26.9856		27.1848	26.8615	24.071	35.4436	22.9629	29.5504
Pd_R2	25.2493	24.9029	23.1554	33.2998	20.4906	27.5651		25.7208	25.6475	23.2532	34.1824	22.4853	27.6125		27.0427	26.7586	23.6321	36.0744	24.5612	27.8235
Pm_R2	24.6262	24.3287	22.52	32.3318	20.9064	27.1914		24.6813	24.3743	21.9354	31.7816	21.6987	26.0811		26.0248	25.8715	23.0286	36.297	25.2024	27.6853
Pv_R2	24.7035	24.3472	21.3929	32.5713	20.106	26.3013		24.9776	24.6988	22.1852	32.9359	21.6899	26.1883		26.1202	25.8473	23.1053	33.1743	23.7039	27.1563
Ad_R3	24.9059	24.3219	21.7408	31.8728	22.0548	26.862		25.5917	25.1101	22.667	33.2185	22.5834	27.1736		27.1614	27.1832	24.2277	36.1638	26.1365	29.7261
Am_R3	24.6208	24.192	21.6238	31.5132	21.5281	26.2551		25.091	24.5921	21.7837	31.1697	23.1184	26.0225		27.1465	27.0346	24.1603	35.3783	25.9014	30.1261
Av_R3	24.9663	24.4302	22.1233	31.5956	21.8301	26.2939		25.1084	24.6323	22.329	32.1286	22.5989	26.11		27.6218	27.6778	24.478	35.7783	24.8516	29.7525
Pd_R3	24.0271	23.4415	21.2514	31.4447	21.0298	25.1492		25.779	25.1237	22.7927	33.8777	24.777	26.3653		26.2953	26.3716	23.3435	34.9837	23.6535	27.6175
Pm_R3	23.6644	23.4157	20.9817	30.8273	21.6336	25.0642		24.4129	23.8425	21.4108	30.9775	22.9438	25.5029		26.1936	26.191	23.346	33.784	24.2449	28.3325
Pv_R3	23.9695	23.7594	21.5636	31.2927	20.7896	25.6538		25.9909	25.8531	23.5119	33.4223	24.3088	27.2912		26.2836	26.5279	23.4488	34.8272	23.8326	28.1566
Ad_R4	26.6679	26.1864	23.9152	33.8832	21.6766	29.1957		26.7559	25.6029	23.8099	33.9035	21.3574	28.1883		27.0095	26.0349	22.9321	36.5268	22.5417	27.3135
Am_R4	26.516	25.5536	24.0815	34.324	20.8258	29.0362		24.9183	23.9352	22.0004	30.737	20.2015	25.5928		26.3157	25.8402	23.0942	35.1801	22.0796	28.6398
Av_R4	26.1462	25.4395	23.0291	33.3779	20.3571	28.0962		25.7938	25.1353	23.3758	33.515	19.9113	27.6471		26.3139	25.6487	23.0606	36.0346	21.5735	27.8444
Pd_R4	26.2746	25.6743	23.2776	33.628	21.0305	28.0492		25.7321	25.0033	22.9299	34.0023	21.3581	26.402		26.7258	26.0028	23.2012	34.8811	22.5718	27.1588
Pm_R4	26.052	25.5451	23.6844	33.024	21.9061	28.1149		24.7613	24.1339	22.1061	31.691	21.0692	25.4746		26.0717	26.0163	23.1174	35.1405	22.1193	28.4036
Pv_R4	25.8722	25.3408	22.9874	33.3304	20.3246	27.7653		25.1708	24.9293	22.6468	32.1339	21.47	26.8041		25.8531	25.4611	22.5036	35.0308	21.1514	27.4898
Ad_R5	26.6958	25.4976	22.9749	33.5804	21.1885	28.6044		26.343	25.2739	23.5166	33.5886	22.2479	28.2251		26.8999	26.5058	23.8381	35.4147	25.4772	29.0037
Am_R5	25.3843	24.6323	22.3022	32.5756	20.7023	26.983		25.2568	24.6178	21.8033	31.1181	21.7953	26.6758		26.8713	26.0057	22.9206	34.1884	23.6691	29.309
Av_R5	24.4959	23.9983	22.9204	31.7253	20.4523	26.5846		25.0962	24.9425	23.1381	33.2755	20.7962	27.0081		26.5181	26.8007	24.2906	36.0354	24.585	28.2234
Pd_R5	25.6297	24.9032	23.0109	33.0544	20.2218	27.8508		25.1569	25.5333	23.4465	34.3331	22.3193	26.7569		27.3667	26.5925	23.545	35.0552	24.0275	28.8695
Pm_R5	25.0054	24.2563	21.7027	32.1491	21.314	27.2506		24.546	24.739	22.0252	31.9562	22.5742	26.8846		25.4746	25.9003	23.7989	35.2359	25.4227	26.9605
Pv_R5	25.5619	24.2551	22.6921	32.9193	20.1691	26.6476		26.0144	25.498	22.6636	33.068	22.0821	26.4514		25.0938	25.4904	22.0984	33.5969	23.1624	27.6567

## Sheet: Cq & ttest target genes
Gene expression data and t-test results. Raw Cq values and RQ (relative expression quantities) are given for each investigated gene in each species. Am_R1 - Am_R5: five biological replicates of anterior stripe tissue; Pm_R1 - Pm_R5: five biological replicates of posterior stripe tissue. RQ (target genes corrected for slc24a5 expression): Inferences of the study were based on expression levels of …
Aristochromis christyi
raw Cq values
		reference gene		chromatophore markers				pmel-related network genes																			target genes and sdf1/fbxw4 related network genes
		rps11		ltk	slc24a5			pmel	rpe65a	vsx1	mybl1	rlbp1a	tbr1b	nr2e3	celf3a	bhlhe22	ets2	evi	foxd3	gbf1	id1	irf9	mps1	srf1	tel2		csf1r	igsf11	sdf1a	bnc2	kita	erbb3b	sdf1a	mitfa	mmp2	mmp14	fbwx4	ednrb1	col14a1a	ifitm5	agpat3
	Am_R1	23.5182		25.7217	30.7946			34.7774	35.0363	33.7977	33.3669	28.7332	34.1263	34.6099	31.152	35.1488	33.2077	30.1404	28.3695	27.761	25.4571	28.8146	34.1779	27.5589	34.3029		27.2434	28.5491	28.5546	27.2012	27.6564	30.6747	28.5046	33.0191	25.7026	26.5029	27.0721	23.2629	33.8862	33.2048	28.962
	Am_R2	24.8338		26.7105	31.4534			36.0037	36.4038	34.382	34.9726	29.9976	35.5847	35.6741	32.1967	36.0853	34.4109	31.0238	29.0956	28.6761	26.5001	30.2569	35.3073	29.0714	35.5529		27.8715	29.5112	29.8424	30.0647	28.1661	31.564	29.3424	33.9175	27.1436	27.3169	28.9627	24.1504	34.0121	33.7003	30.3443
	Am_R3	24.192		26.4657	31.6689			36.1309	35.3605	34.432	32.2222	28.9935	34.9169	33.7088	32.5056	35.0436	33.5864	29.8846	28.6066	27.3113	26.0217	28.7754	33.6801	28.1215	33.7829		27.6299	29.4927	29.6535	27.5768	28.8597	31.293	27.2535	34.3286	26.2537	26.9775	27.8617	24.9081	33.3479	33.1321	28.4645
	Am_R4	25.5536		27.4785	32.3128			36.7661	37.0175	34.3748	34.4655	29.9873	34.2291	36.0956	32.2294	36.7664	34.9827	31.2231	30.2957	28.9109	27.4473	30.5741	35.4931	29.7822	36.2836		28.7072	29.9697	30.7021	29.2989	29.5912	33.0844	30.7021	34.8604	27.8479	28.0173	28.9889	25.6101	34.3902	34.2002	30.5935
	Am_R5	24.6323		26.4873	31.1816			35.7184	36.235	34.4073	34.2128	29.0613	35.202	34.5334	32.205	35.9267	33.9561	30.1793	28.7252	27.7244	26.6242	29.7929	35.2532	28.4248	34.5396		28.0728	28.8152	29.4004	28.6761	28.8772	31.1663	29.6184	34.8002	26.9465	26.8971	27.9877	24.8716	34.2756	33.6982	29.8259
	Pm_R1	24.8424		27.3936	32.4773			34.8112	35.7059	34.6598	34.5517	30.3036	35.1244	36.6099	32.6378	34.4531	34.2349	31.3507	30.0677	29.0329	26.5537	29.9907	36.2626	28.0312	34.7049		28.1959	30.1874	29.9799	29.1608	29.3629	32.0873	29.9799	34.7189	27.4386	27.6083	28.3056	24.9196	34.0022	33.6948	30.2987
	Pm_R2	24.3287		27.2248	31.637			34.4017	34.8945	34.611	33.9276	30.3302	35.7038	36.169	31.9024	34.3477	33.0256	30.3289	29.3923	28.7503	26.7049	30.3344	35.0038	28.6496	35.5307		27.9053	29.7966	29.8042	30.2829	29.0965	32.1803	29.0042	33.9349	26.9239	26.976	28.7627	24.3416	34.3443	33.7855	30.1027
	Pm_R3	23.4157		26.833	31.2787			33.5946	33.6974	32.5656	32.134	29.5141	36.1722	34.6064	31.9107	33.1583	32.7521	29.6287	28.4988	27.0678	26.0741	28.6081	33.2878	28.0596	33.2275		27.7697	29.5675	29.3439	27.8365	28.6713	30.6906	28.3439	33.8145	26.1486	26.6405	27.5435	24.4504	33.5972	32.2568	28.5826
	Pm_R4	25.5451		28.265	32.6696			35.7661	36.3073	34.5603	34.6465	30.6304	35.8893	37.0956	32.1136	35.389	34.8181	31.0494	30.4709	29.2451	28.0406	30.7524	35.7583	30.0875	35.6197		28.9204	31.0835	31.0372	30.1297	29.8055	33.0879	31.0372	34.9807	28.364	28.0814	29.0054	25.5184	34.537	34.5466	31.1935
	Pm_R5	24.2563		27.553	31.8101			34.5184	34.8236	34.2325	33.973	29.9857	35.4984	36.3431	32.8409	34.033	33.3189	30.6971	29.4106	28.6474	26.4657	29.2438	34.8794	28.8858	34.294		28.6587	30.4353	30.2247	28.9759	29.5329	32.142	29.732	34.5332	27.3576	27.4771	27.8378	24.4734	34.2579	33.7087	29.9066
RQ (target genes corrected for slc24a5 expression)
								pmel	rpe65a	vsx1	mybl1	rlbp1a	tbr1b	nr2e3	celf3a	bhlhe22	ets2	evi	foxd3	gbf1	id1	irf9	mps1	srf1	tel2		csf1r	igsf11	sdf1a	bnc2	kita	erbb3b	sdf1a	mitfa	mmp2	mmp14	fbwx4	ednrb1	col14a1a	ifitm5	agpat3
	Am_R1							1	1	1	1	1	1	1	1	1	1	1	1	1	1	1	1	1	1		1	1	1	1	1	1	1	1	1	1	1	1	1	1	1
	Am_R2							0.674785	0.611842	1.053	0.518746	0.657198	0.574508	0.755027	0.765301	0.824905	0.685677	0.855832	0.954423	0.837232	0.766204	0.580956	0.721664	0.553364	0.663791		1.02151	0.810397	0.646624	0.21693	1.10888	0.852339	0.883315	0.84698	0.581479	0.898008	0.425786	0.853404	1.44683	1.11985	0.605605
	Am_R3							0.717375	1.46414	1.18099	4.05303	1.53044	1.05973	3.42333	0.717326	1.97178	1.40991	2.18874	1.55531	2.50359	1.23945	1.88361	2.58847	1.24117	2.62861		1.4023	0.9531	0.855832	1.41294	0.796088	1.19416	4.36324	0.739591	1.2511	1.31923	1.06047	0.586052	2.66217	1.92786	2.58793
	Am_R4							0.721714	0.725441	1.91999	1.33756	1.20089	2.66734	1.02278	1.35736	0.933421	0.836942	1.35238	0.753667	1.29083	0.720964	0.845983	1.15109	0.6134	0.725728		1.03843	1.06999	0.64649	0.669196	0.749188	0.539053	0.624468	0.79935	0.647477	1.00264	0.758594	0.562919	2.01978	1.43674	0.924471
	Am_R5							0.681102	0.569669	0.857009	0.727524	1.04168	0.620377	1.37885	0.630236	0.762649	0.778414	1.27288	1.02187	1.34125	0.582333	0.66372	0.62057	0.717528	1.10979		0.735899	1.08741	0.72758	0.470448	0.561029	0.930025	0.60422	0.380481	0.552127	0.994999	0.693209	0.428775	0.998315	0.928864	0.71851
	Pm_R1							3.13594	2.01818	1.76614	1.41216	1.08095	1.60726	0.80257	1.14623	5.1996	1.57516	1.38742	0.989314	1.32942	1.50118	1.4207	0.756808	2.31402	2.42957		1.65887	1.03125	1.19532	0.825363	0.983638	1.20589	1.15461	0.988217	0.963729	1.49205	1.36528	1.01819	2.96226	2.2858	1.27103
	Pm_R2							2.3264	1.97815	1.02038	1.21563	0.592711	0.600776	0.608488	1.06585	3.12423	2.03425	1.57342	0.882458	0.903189	0.755027	0.625291	1.0115	0.841888	0.765567		1.13328	0.755184	0.754085	0.211789	0.660807	0.631476	1.26822	0.950396	0.769024	1.29173	0.555477	0.84892	1.30518	1.19889	0.81321
	Pm_R3							3.17532	3.53804	3.2857	3.28752	0.814056	0.338728	1.40211	0.826679	5.55813	1.91813	1.99419	1.27881	2.26153	0.911996	1.61395	2.59233	0.98856	2.94752		0.971173	0.690494	0.80933	0.900501	0.692171	1.38338	1.56352	0.805915	1.02676	1.27147	1.00884	0.614123	1.70894	2.69839	1.81945
	Pm_R4							1.84843	1.51982	2.16205	1.51089	0.98473	1.08073	0.654879	1.88348	3.10544	1.2013	1.95342	0.854765	1.31121	0.611956	0.957404	1.22654	0.635692	1.47243		1.14711	0.633142	0.656288	0.481798	0.826966	0.68863	0.633932	0.94174	0.579789	1.22816	0.960395	0.768171	2.33626	1.44714	0.781057
	Pm_R5							2.41923	2.34264	1.49561	1.32812	0.848511	0.780995	0.608072	0.627021	4.38124	1.87166	1.37441	0.982402	1.09363	1.00482	1.5014	1.24315	0.80584	2.03413		0.757966	0.546885	0.635254	0.590838	0.550575	0.731122	0.86343	0.707801	0.641962	1.02908	1.18901	0.873555	1.5624	1.42566	1.05037
p-values in paired t-test on log transformed RQ (base 2)								0.000166006	0.00195219	0.0745152	0.136967	0.14307	0.46527	0.0228603	0.0436702	0.000482686	0.0161062	0.101732	0.488016	0.873561	0.600736	0.215191	0.377097	0.264795	0.0337993		0.620542	0.0793605	0.63218	0.266322	0.32754	0.949623	0.91361	0.152136	0.854374	0.0903629	0.0505265	0.187484	0.43251	0.0851795	0.611957
RQ (target genes corrected for mitfa expression)
								pmel	rpe65a	vsx1	mybl1	rlbp1a	tbr1b	nr2e3	celf3a	bhlhe22	ets2	evi	foxd3	gbf1	id1	irf9	mps1	srf1	tel2		csf1r	igsf11	sdf1a	bnc2	kita	erbb3b	sdf1a	mitfa	mmp2	mmp14	fbwx4	ednrb1	col14a1a	ifitm5	agpat3
	Am_R1							1	1	1	1	1	1	1	1	1	1	1	1	1	1	1	1	1	1		1	1	1	1	1	1	1		1	1	1	1	1	1	1
	Am_R2							0.796695	0.722381	1.24324	0.612465	0.775931	0.678302	0.891434	0.903565	0.973937	0.809554	1.01045	1.12685	0.988491	0.90463	0.685914	0.852044	0.653337	0.783714		1.20606	0.956807	0.763447	0.256121	1.30921	1.00633	0.763447		0.686533	1.06025	0.502711	1.00758	1.70823	1.32216	0.715017
	Am_R3							0.969962	1.97966	1.59682	5.48009	2.06931	1.43286	4.62868	0.969895	2.66604	1.90633	2.95939	2.10293	3.3851	1.67586	2.54683	3.49987	1.67818	3.55414		1.89605	1.28869	1.15717	1.91043	1.07639	1.61463	1.15717		1.69161	1.78373	1.43386	0.7924	3.59951	2.60666	3.49914
	Am_R4							0.902876	0.907538	2.40194	1.6733	1.50233	3.33688	1.27952	1.69807	1.16772	1.04703	1.69185	0.94285	1.61485	0.901938	1.05834	1.44003	0.767373	0.907897		1.29909	1.33858	0.808769	0.837174	0.937246	0.674364	0.808769		0.810003	1.25432	0.949013	0.704221	2.52678	1.79739	1.15653
	Am_R5							1.79011	1.49723	2.25243	1.91212	2.7378	1.63051	3.62397	1.65642	2.00443	2.04587	3.34544	2.68574	3.52515	1.53052	1.74442	1.63101	1.88584	2.9168		1.93413	2.85798	1.91226	1.23646	1.47452	2.44434	1.91226		1.45113	2.61511	1.82193	1.12693	2.62382	2.44129	1.88842
	Pm_R1							3.17334	2.04224	1.7872	1.42899	1.09384	1.62642	0.81214	1.1599	5.26159	1.59394	1.40396	1.00111	1.34527	1.51908	1.43764	0.765832	2.34161	2.45854		1.67865	1.04355	1.20957	0.835204	0.995367	1.22027	1.20957		0.97522	1.50984	1.38156	1.03033	2.99758	2.31306	1.28619
	Pm_R2							2.44782	2.0814	1.07363	1.27907	0.623646	0.632133	0.640247	1.12148	3.28729	2.14043	1.65554	0.928517	0.95033	0.794434	0.657927	1.0643	0.885829	0.805524		1.19243	0.7946	0.793444	0.222843	0.695296	0.664435	0.793444		0.809162	1.35915	0.58447	0.893228	1.3733	1.26146	0.855654
	Pm_R3							3.94001	4.39009	4.07698	4.07924	1.0101	0.420303	1.73977	1.02576	6.89667	2.38006	2.47444	1.58678	2.80617	1.13163	2.00264	3.21663	1.22663	3.65735		1.20506	0.856782	1.00424	1.11736	0.858863	1.71654	1.00424		1.27403	1.57767	1.2518	0.76202	2.12049	3.34823	2.25762
	Pm_R4							1.96278	1.61384	2.2958	1.60436	1.04565	1.14758	0.695393	2	3.29756	1.27562	2.07426	0.907645	1.39233	0.649815	1.01663	1.30242	0.675019	1.56352		1.21807	0.672311	0.696889	0.511604	0.878126	0.731231	0.696889		0.615658	1.30414	1.01981	0.815694	2.48079	1.53666	0.829377
	Pm_R5							3.41796	3.30974	2.11304	1.8764	1.1988	1.10341	0.859101	0.885871	6.18993	2.64432	1.94181	1.38796	1.54512	1.41963	2.12122	1.75635	1.13851	2.87387		1.07087	0.772654	0.897504	0.834752	0.777866	1.03295	0.897504		0.90698	1.45392	1.67986	1.23418	2.2074	2.01421	1.48398
p-values in paired t-test on log transformed RQ (base 2)								0.00171408	0.000558992	0.305514	0.459436	0.0711832	0.22549	0.0337032	0.959968	0.000634712	0.0437007	0.755525	0.118186	0.377435	0.516288	0.675576	0.728177	0.871611	0.179041		0.568896	0.0944036	0.366807	0.0124864	0.0832947	0.399716	0.366807		0.184502	0.990864	0.469355	0.670138	0.914651	0.509365	0.451896
RQ (target genes not corrected for slc24a5/mitfa expression)
				chromatophore markers
				ltk	slc24a5			pmel	rpe65a	vsx1	mybl1	rlbp1a	tbr1b	nr2e3	celf3a	bhlhe22	ets2	evi	foxd3	gbf1	id1	irf9	mps1	srf1	tel2		csf1r	igsf11	sdf1a	bnc2	kita	erbb3b	sdf1a	mitfa	mmp2	mmp14	fbwx4	ednrb1	col14a1a	ifitm5	agpat3
	Am_R1			1	1			1	1	1	1	1	1	1	1	1	1	1	1	1	1	1	1	1	1		1	1	1	1	1	1	1	1	1	1	1	1	1	1	1
	Am_R2			1.25423	1.57658			1.06385	0.96462	1.66013	0.817845	1.03613	0.90576	1.19036	1.20656	1.30053	1.08103	1.34929	1.50473	1.31997	1.20798	0.915924	1.13776	0.872423	1.04652		1.61049	1.27766	1.01946	0.342008	1.74824	1.34378	1.39262	1.33533	0.91675	1.41578	0.671286	1.34546	2.28105	1.76553	0.954786
	Am_R3			0.952506	0.870249			0.624295	1.27416	1.02776	3.52714	1.33187	0.922231	2.97915	0.624252	1.71594	1.22697	1.90475	1.3535	2.17875	1.07863	1.63921	2.25261	1.08013	2.28754		1.22035	0.829435	0.744787	1.22961	0.692795	1.03922	3.79711	0.643628	1.08877	1.14806	0.92287	0.510011	2.31675	1.67772	2.25215
	Am_R4			1.21302	1.43117			1.0329	1.03823	2.74784	1.91428	1.71868	3.81743	1.46378	1.94261	1.33589	1.19781	1.93549	1.07863	1.8474	1.03183	1.21075	1.64741	0.877883	1.03864		1.48617	1.53135	0.92524	0.957736	1.07222	0.77148	0.893723	1.14401	0.926652	1.43495	1.08568	0.805636	2.89066	2.05623	1.32308
	Am_R5			1.2732	1.65533			1.12745	0.942991	1.41863	1.20429	1.72433	1.02693	2.28246	1.04325	1.26244	1.28853	2.10703	1.69154	2.22022	0.963954	1.09868	1.02725	1.18775	1.83706		1.21816	1.80002	1.20439	0.778747	0.928689	1.5395	1.00018	0.629822	0.913954	1.64705	1.14749	0.709764	1.65254	1.53758	1.18937
	Pm_R1			0.785836	0.779975			2.44596	1.57413	1.37755	1.10145	0.843114	1.25362	0.625985	0.894033	4.05556	1.22859	1.08215	0.77164	1.03692	1.17089	1.10811	0.590292	1.80488	1.895		1.29388	0.804353	0.932322	0.643762	0.767213	0.940565	0.900564	0.770785	0.751685	1.16377	1.06489	0.794159	2.31049	1.78287	0.991373
	Pm_R2			0.618738	0.978131			2.27553	1.93489	0.998061	1.18904	0.579749	0.587638	0.595181	1.04254	3.05591	1.98977	1.53901	0.86316	0.883438	0.738515	0.611617	0.989382	0.823477	0.748825		1.10849	0.738669	0.737595	0.207158	0.646356	0.617667	1.24048	0.929612	0.752206	1.26348	0.54333	0.830355	1.27664	1.17267	0.795426
	Pm_R3			0.431132	0.66591			2.11448	2.35602	2.18798	2.18919	0.542088	0.225563	0.93368	0.550494	3.70122	1.2773	1.32795	0.851572	1.50598	0.607308	1.07475	1.72626	0.658292	1.96278		0.646714	0.459807	0.538941	0.599653	0.460924	0.921209	1.04117	0.536667	0.683731	0.846687	0.671798	0.408951	1.138	1.79689	1.21159
	Pm_R4			0.699114	1.11103			2.05366	1.68857	2.40211	1.67865	1.09407	1.20072	0.727591	2.0926	3.45025	1.33469	2.17031	0.949671	1.4568	0.679903	1.06371	1.36273	0.706274	1.63592		1.27447	0.70344	0.729156	0.535293	0.918786	0.765089	0.704319	1.0463	0.644164	1.36453	1.06703	0.853463	2.59566	1.60781	0.867779
	Pm_R5			0.468741	0.825083			1.99607	1.93287	1.234	1.09581	0.700092	0.644386	0.50171	0.517344	3.61489	1.54427	1.134	0.810563	0.902339	0.829059	1.23878	1.0257	0.664885	1.67832		0.625385	0.451226	0.524137	0.48749	0.45427	0.603237	0.712401	0.583995	0.529672	0.849079	0.981031	0.720755	1.28911	1.17629	0.866638
p-values in paired t-test on log transformed RQ (base 2)				0.00658576	0.0115813			0.00176235	0.00037731	0.801499	0.757189	0.0124615	0.0892077	0.00866375	0.197409	0.000784465	0.0828882	0.438434	0.0163462	0.0699406	0.0917791	0.279947	0.0610743	0.505422	0.612389		0.139619	0.0216929	0.0484489	0.000410537	0.0300696	0.125129	0.133992	0.0226705	0.00388413	0.22743	0.132697	0.152178	0.584312	0.770044	0.0405526
Buccochromis rhoadesii
raw Cq values
		reference gene		chromatophore markers				pmel-related network genes						target genes and sdf1/fbxw4 related network genes
		rps11		ltk	slc24a5			pmel	rpe65a	bhlhe22	ets2	tel2		csf1r	igsf11	sdf1a	bnc2	kita	erbb3b	mitfa	mmp2	mmp14	fbwx4	ednrb1	olfm3	ppap2b	pdgfra	col14a1a	fbn1	zcchc24	prrx1	fstl1	gli3	dlx5a	dlx1a	flt4	ifitm5	cpxm1a	bmp4	agpat3	evi1	irf8	irf9	mef2a	nr2f1	nr2f2	pparg	ppara	rap1
	Am_R1	25.1456		27.0366	31.5274			35.4314	37.5238	35.6558	32.2964	34.2966		27.4169	28.907	29.3127	28.0759	28.5497	31.2668	30.0958	26.7415	26.8869	27.9675	24.3951	35.4109	26.9115	28.0079	35.7079	27.1151	27.6666	27.1837	28.9689	27.8259	29.2176	34.7466	31.0152	34.7104	29.3839	31.0027	29.9392	32.0178	31.0497	29.4981	27.444	30.6247	29.3581	32.5291	30.8543	27.3802
	Am_R2	24.3672		26.3563	31.2388			35.0525	36.7831	35.035	33.0516	33.4821		27.095	28.8427	28.7244	27.7452	27.4197	33.0955	29.7199	26.0459	27.0354	27.42	24.0071	34.5795	26.6464	27.6163	35.6823	26.8253	26.6529	26.7067	28.9958	27.8666	28.4251	35.0638	29.3945	34.1512	29.4271	30.0693	29.5617	31.0976	31.126	29.3349	26.6895	30.878	29.4056	31.9798	30.6725	27.2621
	Am_R3	24.5921		26.4543	31.7052			35.3913	36.333	36.9269	33.1936	32.9338		27.4277	28.7178	28.6248	27.1815	28.2418	31.2182	29.5164	25.8471	26.3529	28.1151	24.2244	35.7567	26.1908	27.562	35.0788	26.5133	27.0468	26.3822	28.5993	27.6176	28.1507	34.6736	29.351	34.4181	28.9212	29.5657	29.5459	30.7584	30.3031	28.6079	26.8587	30.627	28.8244	31.1701	30.3247	27.171
	Am_R4	23.9352		26.0527	30.7687			35.0229	36.4628	34.231	30.4367	32.339		27.0409	28.5203	28.2874	27.2347	27.6411	30.4743	29.9247	26.0867	26.4426	27.2039	23.6681	35.3204	26.3628	27.0583	34.7543	26.5094	27.1249	26.4973	29.2053	27.4789	27.7195	36.1016	29.4252	33.2477	29.051	28.9744	29.6138	31.3113	30.335	28.3356	26.3355	30.3974	28.241	31.5548	30.0191	27.2979
	Am_R5	24.6178		26.7338	31.1766			35.5631	37.108	35.7395	32.4219	33.3974		27.5841	29.0036	28.9207	27.7927	27.7698	30.9694	30.2919	26.469	26.9861	27.7894	24.3958	34.8302	26.2245	27.8951	35.4958	26.9496	26.7694	26.9802	29.2868	27.2969	28.6539	35.7018	30.1953	34.4541	28.8522	29.5903	29.9539	31.6218	30.369	29.0995	27.0975	30.8695	28.8285	31.4316	30.8564	26.955
	Pm_R1	26.0043		28.4516	32.9347			36.4314	37.9238	34.6171	33.7645	34.491		28.048	29.6218	29.788	28.8561	29.1286	32.2164	30.7732	27.7519	27.2724	29.5899	25.4556	35.1307	27.1927	28.1631	35.8774	27.8944	28.2205	28.1625	30.7054	28.2855	30.0738	35.7466	32.2391	34.8875	29.8406	31.1878	30.4987	32.5535	31.9211	30.1579	28.2199	31.9596	29.9878	33.2022	30.9343	27.88
	Pm_R2	24.3743		27.4546	31.7313			35.2367	36.5177	34.3947	33.3282	34.0184		27.7829	29.6623	28.1061	28.8493	28.8794	30.8212	30.1835	25.9885	27.3784	28.1791	24.5524	35.2146	27.0831	27.8841	34.3342	27.3112	27.4047	27.4401	29.5133	28.4085	28.5489	35.1699	29.7064	32.5731	29.337	30.0797	30.1272	31.3267	30.9403	29.1161	27.3851	31.466	29.6911	32.1681	31.2941	27.5549
	Pm_R3	23.8425		27.1779	31.249			34.8913	36.1901	33.1553	33.1521	33.5611		27.4686	28.9435	27.4603	27.842	28.7351	30.8955	29.8096	26.0898	26.1575	28.2925	24.417	34.9174	26.3384	27.5049	33.1534	27.2972	27.3966	26.757	29.098	27.6956	27.9865	34.3501	29.1512	32.6735	29.3849	29.8858	29.4378	30.7758	30.2332	28.4726	27.0498	30.4654	28.765	31.1255	29.9405	26.9843
	Pm_R4	24.1339		27.5537	31.282			35.296	37.1488	34.149	31.8442	32.1281		27.903	29.5464	28.0423	28.2394	28.2348	31.6642	31.0994	27.0624	27.0626	28.2179	25.0176	35.2755	27.499	27.8959	33.0674	27.6906	28.2169	28.0312	31.15	28.6135	29.9289	35.4465	31.0605	31.9911	30.8033	29.9579	30.8327	31.8567	30.3544	28.3243	27.906	31.3928	29.8324	31.7756	30.1938	27.5188
	Pm_R5	24.739		28.0481	31.5658			35.6526	37.2115	34.5115	32.8898	33.393		27.4572	29.7547	28.318	28.8802	28.4095	31.9438	30.5897	26.49	26.7016	28.6826	24.6375	35.3232	27.1938	27.4264	34.0004	27.2596	28.2452	27.2522	30.4721	28.3596	28.968	35.6218	30.9748	33.1379	29.496	29.9334	30.5494	31.3838	30.5398	28.6623	27.308	31.1887	29.8024	32.3945	30.2929	27.6388
RQ (target genes corrected for slc24a5 expression)
								pmel	rpe65a	bhlhe22	ets2	tel2		csf1r	igsf11	sdf1a	bnc2	kita	erbb3b	mitfa	mmp2	mmp14	fbwx4	ednrb1	olfm3	ppap2b	pdgfra	col14a1a	fbn1	zcchc24	prrx1	fstl1	gli3	dlx5a	dlx1a	flt4	ifitm5	cpxm1a	bmp4	agpat3	evi1	irf8	irf9	mef2a	nr2f1	nr2f2	pparg	ppara	rap1
	Am_R1							1	1	1	1	1		1	1	1	1	1	1	1	1	1	1	1	1	1	1	1	1	1	1	1	1	1	1	1	1	1	1	1	1	1	1	1	1	1	1	1	1
	Am_R2							1.06459	1.36803	1.25893	0.485048	1.43983		1.02335	0.85601	1.23089	1.02961	1.79179	0.230478	1.06238	1.32593	0.738618	1.19657	1.07133	1.4568	0.983843	1.074	0.833353	1.00083	1.65302	1.1395	0.803572	0.795923	1.41804	0.657107	2.51769	1.20631	0.794545	1.56352	1.06356	1.54928	0.776523	0.91675	1.38118	0.686866	0.79218	1.19806	0.928646	0.888535
	Am_R3							1.16304	2.5822	0.468688	0.60735	2.90915		1.12272	1.28967	1.82222	2.10264	1.40027	1.16991	1.69021	2.10264	1.63785	1.02115	1.27324	0.890076	1.86413	1.54082	1.74945	1.71665	1.73821	1.97151	1.46145	1.30686	2.36969	1.18987	3.58507	1.38521	1.55887	3.06269	1.48566	2.70795	1.89789	2.09652	1.69713	1.12936	1.63751	2.9015	1.63286	1.30767
	Am_R4							0.784475	1.23311	1.58678	2.14503	2.29565		0.767001	0.772711	1.20297	1.05885	1.10949	1.0237	0.665449	0.930514	0.804185	1.0034	0.978267	0.629291	0.864537	1.14148	1.14464	0.899378	0.860353	0.95112	0.501701	0.751737	1.66948	0.231054	1.77929	1.62902	0.744426	2.41095	0.740566	0.964464	0.969962	1.32299	1.27438	0.691883	1.282	1.16119	1.05446	0.625725
	Am_R5							0.715764	1.04611	0.739976	0.718844	1.46251		0.698339	0.733376	1.02901	0.954224	1.34646	0.963694	0.684501	0.947161	0.732045	0.8872	0.783796	1.17275	1.26247	0.84792	0.908356	0.879454	1.46046	0.902932	0.629106	1.13148	1.15904	0.404448	1.38423	0.936581	1.13357	2.08733	0.776208	1.03185	1.25698	1.03369	0.997065	0.661765	1.13198	1.67799	0.783017	1.05291
	Pm_R1							1.3262	2.01015	5.44903	0.958732	2.31803		1.71261	1.61608	1.90792	1.54446	1.77571	1.37335	1.65852	1.31668	2.03045	0.861486	1.27174	3.22098	2.18268	2.38188	2.35839	1.54542	1.80675	1.34583	0.795978	1.9288	1.4652	1.3262	1.13556	2.346	1.93268	2.33302	1.79975	1.82969	1.44985	1.67888	1.54907	1.05146	1.71428	1.66347	2.50933	1.87579
	Pm_R2							1.31823	2.31338	2.76063	0.563349	1.39678		0.893723	0.682358	2.65829	0.67385	0.916496	1.56862	1.08388	1.94113	0.819264	0.994677	1.03283	1.31969	1.02264	1.25501	2.98473	1.00542	1.38108	0.964264	0.789768	0.76913	1.83096	0.858923	2.85344	5.06706	1.18987	2.18389	1.01108	1.85961	1.24255	1.50098	1.19981	0.64287	0.914402	1.47928	0.849155	1.02045
	Pm_R3							1.19889	2.07815	4.66559	0.455619	1.37278		0.795481	0.803907	2.97729	0.969626	0.725074	1.06651	1.00542	1.29531	1.36699	0.658201	0.812084	1.16078	1.22663	1.16845	4.84367	0.726734	0.994194	1.10826	0.753929	0.902438	1.93549	1.0853	3.00133	3.38346	0.823934	1.78819	1.16716	1.95017	1.45206	1.67842	1.08358	0.920762	1.24375	2.18132	1.55337	1.08485
	Pm_R4							0.926588	1.09399	2.39728	1.15413	3.79237		0.602277	0.541563	2.03496	0.753197	1.04935	0.640469	0.42074	0.675347	0.746855	0.709168	0.547944	0.926588	0.5614	0.91168	5.26014	0.566089	0.576064	0.468818	0.186016	0.488693	0.515234	0.519322	0.817505	5.55544	0.315388	1.74038	0.454106	0.943242	1.36595	1.90316	0.612423	0.495343	0.607224	1.42218	1.33339	0.76631
	Pm_R5							0.880973	1.27515	2.27007	0.680665	1.92122		0.99868	0.570667	2.04648	0.588095	1.13181	0.642334	0.72925	1.22255	1.16774	0.625595	0.868182	1.09133	0.844448	1.53675	3.35402	0.929116	0.687697	0.979393	0.362283	0.709403	1.22094	0.559882	1.05614	3.05452	0.950178	2.15505	0.672807	1.59376	1.46233	1.83302	1.12851	0.694656	0.754782	1.12742	1.51551	0.858446
p-values in paired t-test on log transformed RQ (base 2)								0.0125578	0.288325	0.0194219	0.26489	0.570237		0.851424	0.378856	0.000267537	0.190507	0.439336	0.594283	0.701156	0.909594	0.287654	0.00580277	0.413347	0.224347	0.730129	0.376207	0.000510742	0.501936	0.326232	0.32309	0.0447755	0.573822	0.646011	0.0911041	0.306126	0.000509128	0.696857	0.789824	0.726659	0.35041	0.178325	0.0773394	0.501266	0.246768	0.541269	0.791122	0.166293	0.489973
RQ (target genes corrected for mitfa expression)
								pmel	rpe65a	bhlhe22	ets2	tel2		csf1r	igsf11	sdf1a	bnc2	kita	erbb3b	mitfa	mmp2	mmp14	fbwx4	ednrb1	olfm3	ppap2b	pdgfra	col14a1a	fbn1	zcchc24	prrx1	fstl1	gli3	dlx5a	dlx1a	flt4	ifitm5	cpxm1a	bmp4	agpat3	evi1	irf8	irf9	mef2a	nr2f1	nr2f2	pparg	ppara	rap1
	Am_R1							1	1	1	1	1		1	1	1	1	1	1		1	1	1	1	1	1	1	1	1	1	1	1	1	1	1	1	1	1	1	1	1	1	1	1	1	1	1	1	1
	Am_R2							1.00208	1.2877	1.18501	0.456567	1.35529		0.963262	0.805748	1.15861	0.969155	1.68658	0.216945		1.24807	0.695248	1.12631	1.00842	1.37126	0.926074	1.01094	0.784421	0.942066	1.55595	1.07259	0.756389	0.749188	1.33478	0.618523	2.36986	1.13548	0.747891	1.47172	1.00111	1.45831	0.730927	0.862921	1.30008	0.646535	0.745665	1.12771	0.874118	0.836362
	Am_R3							0.688105	1.52774	0.277296	0.359335	1.72118		0.664251	0.763024	1.07811	1.24401	0.828458	0.692171		1.24401	0.969021	0.604159	0.753302	0.526608	1.1029	0.911617	1.03505	1.01565	1.0284	1.16643	0.864657	0.773193	1.40201	0.703977	2.12108	0.819548	0.922295	1.81202	0.878979	1.60214	1.12288	1.2404	1.0041	0.668176	0.96882	1.71665	0.96607	0.773675
	Am_R4							1.17887	1.85305	2.38452	3.22344	3.44977		1.15261	1.16119	1.80776	1.59118	1.66728	1.53837		1.39833	1.20849	1.50786	1.47009	0.945664	1.29918	1.71535	1.72011	1.35154	1.29289	1.42929	0.753929	1.12967	2.5088	0.347215	2.67382	2.44799	1.11868	3.62304	1.11288	1.44934	1.45761	1.98811	1.91507	1.03972	1.92652	1.74497	1.58458	0.940305
	Am_R5							0.633116	1.52828	1.08104	1.05017	2.13661		1.02022	1.0714	1.5033	1.39404	1.96707	1.40788		0.837794	0.647517	0.784757	0.693292	1.7133	1.84437	1.23874	1.32703	1.28481	2.13362	1.31911	0.919072	1.65299	1.69327	0.590865	2.02224	1.36827	1.65605	3.04942	1.13398	1.50744	1.83635	1.51013	1.45663	0.966784	1.65373	2.45141	1.14392	1.53822
	Pm_R1							0.799628	1.21201	3.28547	0.578064	1.39765		1.03261	0.974409	1.15037	0.931224	1.07066	0.828056		0.793884	1.22425	0.51943	0.766788	1.94208	1.31604	1.43614	1.42198	0.931805	1.08937	0.811465	0.479931	1.16296	0.883438	0.799628	0.684679	1.41451	1.1653	1.40669	1.08515	1.1032	0.874179	1.01227	0.934004	0.633976	1.03362	1.00298	1.51299	1.131
	Pm_R2							1.21622	2.13435	2.547	0.519754	1.28869		0.824562	0.629553	2.45258	0.621704	0.845572	1.44724		1.79092	0.755865	0.917703	0.952902	1.21757	0.943504	1.15789	2.75375	0.927616	1.27421	0.889644	0.728651	0.709611	1.68927	0.792454	2.63262	4.67495	1.09779	2.01489	0.932839	1.7157	1.14639	1.38482	1.10696	0.593122	0.84364	1.36481	0.783443	0.941478
	Pm_R3							1.19243	2.06694	4.64043	0.453162	1.36538		0.791192	0.799572	2.96124	0.964398	0.721164	1.06076		1.28833	1.35962	0.654652	0.807705	1.15453	1.22002	1.16215	4.81755	0.722816	0.988834	1.10229	0.749864	0.897572	1.92506	1.07945	2.98514	3.36522	0.819491	1.77855	1.16086	1.93965	1.44423	1.66937	1.07773	0.915797	1.23705	2.16956	1.54499	1.079
	Pm_R4							2.20228	2.60016	5.69778	2.74309	9.01358		1.43147	1.28717	4.83662	1.79017	2.49407	1.52224		1.60514	1.7751	1.68553	1.30233	2.20228	1.33432	2.16685	12.5021	1.34546	1.36917	1.11427	0.442117	1.16151	1.22459	1.23431	1.94302	13.204	0.749604	4.13647	1.0793	2.24187	3.24653	4.52338	1.45559	1.17731	1.44323	3.38018	3.16916	1.82134
	Pm_R5							0.647132	1.74858	3.11288	0.933377	2.63451		1.36946	0.782539	2.80628	0.806438	1.55202	0.880814		0.898045	0.857779	0.459541	0.637737	1.49651	1.15797	2.1073	4.59927	1.27407	0.943019	1.34301	0.496789	0.972784	1.67424	0.76775	1.44825	4.18858	1.30295	2.95516	0.922602	2.18548	2.00525	2.51357	1.54749	0.952561	1.03501	1.54599	2.07818	1.17716
p-values in paired t-test on log transformed RQ (base 2)								0.217231	0.0101139	0.0236035	0.529799	0.297595		0.229452	0.347086	0.011303	0.118471	0.544627	0.472158		0.477085	0.00832427	0.19773	0.166048	0.137815	0.945712	0.0113392	0.00880384	0.243154	0.333691	0.053248	0.0391044	0.704359	0.759237	0.17889	0.462828	0.00655934	0.76761	0.135513	0.903715	0.0175754	0.141972	0.0335921	0.321617	0.863479	0.62023	0.527853	0.0414737	0.271459
RQ (target genes not corrected for slc24a5/mitfa expression)
				chromatophore markers
				ltk	slc24a5			pmel	rpe65a	bhlhe22	ets2	tel2		csf1r	igsf11	sdf1a	bnc2	kita	erbb3b	mitfa	mmp2	mmp14	fbwx4	ednrb1	olfm3	ppap2b	pdgfra	col14a1a	fbn1	zcchc24	prrx1	fstl1	gli3	dlx5a	dlx1a	flt4	ifitm5	cpxm1a	bmp4	agpat3	evi1	irf8	irf9	mef2a	nr2f1	nr2f2	pparg	ppara	rap1
	Am_R1			1	1			1	1	1	1	1		1	1	1	1	1	1	1	1	1	1	1	1	1	1	1	1	1	1	1	1	1	1	1	1	1	1	1	1	1	1	1	1	1	1	1	1
	Am_R2			0.934263	0.712124			0.758121	1.36803	0.896515	0.345414	1.02534		0.728752	0.609585	0.876545	0.733211	1.27597	0.164129	0.756546	0.944223	0.525987	0.852103	0.762918	1.03742	0.700618	0.764824	0.593451	0.712716	1.17715	0.811465	0.572243	0.566795	1.00982	0.467941	1.79291	0.859042	0.565814	1.11342	0.757386	1.10328	0.55298	0.652839	0.98357	0.489133	0.56413	0.853167	0.661311	0.632747
	Am_R3			1.02016	0.602361			0.700569	2.5822	0.282319	0.365844	1.75236		0.676283	0.776846	1.09764	1.26655	0.843465	0.704709	1.01811	1.26655	0.986575	0.615103	0.766948	0.536147	1.12288	0.928131	1.0538	1.03405	1.04703	1.18756	0.88032	0.787199	1.42741	0.716729	2.1595	0.834394	0.939002	1.84485	0.894901	1.63116	1.14322	1.26286	1.02229	0.68028	0.986369	1.74775	0.98357	0.78769
	Am_R4			0.854706	0.731181			0.573593	1.23311	1.16022	1.56841	1.67853		0.560816	0.564991	0.879588	0.774212	0.81124	0.748513	0.486563	0.680374	0.588005	0.733668	0.71529	0.460126	0.632133	0.834625	0.836942	0.657608	0.629073	0.695441	0.366834	0.549656	1.22069	0.168942	1.30098	1.1911	0.54431	1.76284	0.541488	0.705198	0.709217	0.967343	0.931805	0.505892	0.937376	0.849037	0.770999	0.457518
	Am_R5			0.855628	0.884532			0.633116	1.04611	0.654532	0.63584	1.29364		0.617703	0.648694	0.910194	0.844042	1.19099	0.852418	0.605463	0.837794	0.647517	0.784757	0.693292	1.03734	1.1167	0.750012	0.80347	0.777905	1.29183	0.798673	0.556464	1.00083	1.02521	0.357747	1.22439	0.828435	1.00268	1.84631	0.686581	0.912702	1.11184	0.914329	0.881936	0.585352	1.00127	1.48424	0.692603	0.931334
	Pm_R1			0.680044	0.683683			0.906702	2.01015	3.72541	0.655469	1.5848		1.17089	1.10489	1.30441	1.05592	1.21403	0.938937	1.13391	0.900189	1.38819	0.588984	0.869465	2.20213	1.49226	1.62845	1.61239	1.05658	1.23525	0.920124	0.544197	1.31869	1.00173	0.906702	0.776361	1.60392	1.32134	1.59505	1.23046	1.25093	0.991236	1.14782	1.05907	0.718869	1.17202	1.13729	1.71558	1.28245
	Pm_R2			0.438516	0.508669			0.670542	2.31338	1.40425	0.286558	0.710497		0.45461	0.347094	1.35219	0.342767	0.466193	0.797911	0.551335	0.987396	0.416734	0.505962	0.525368	0.671286	0.520186	0.638386	1.51824	0.511427	0.702515	0.490491	0.401731	0.391233	0.931353	0.436908	1.45146	2.57746	0.605249	1.11088	0.514306	0.945927	0.632045	0.7635	0.610304	0.327008	0.465128	0.752467	0.431939	0.51907
	Pm_R3			0.367445	0.491512			0.58927	2.07815	2.2932	0.223942	0.674738		0.390989	0.39513	1.46338	0.476583	0.356383	0.524204	0.494177	0.636662	0.671891	0.323514	0.399149	0.57054	0.602904	0.574309	2.38072	0.357199	0.488659	0.544725	0.370565	0.44356	0.951318	0.533441	1.47519	1.66301	0.404974	0.878918	0.573673	0.958533	0.713705	0.824962	0.532591	0.452566	0.61132	1.07214	0.7635	0.533219
	Pm_R4			0.346566	0.587923			0.544763	1.09399	1.40942	0.678537	2.22962		0.354093	0.318397	1.1964	0.442822	0.616939	0.376547	0.247363	0.397052	0.439093	0.416937	0.322149	0.544763	0.33006	0.535998	3.09256	0.332817	0.338681	0.275629	0.109363	0.287314	0.302918	0.305321	0.48063	3.26617	0.185424	1.02321	0.266979	0.554554	0.803071	1.11891	0.360058	0.291224	0.357001	0.83613	0.783932	0.450532
	Pm_R5			0.374187	0.734565			0.647132	1.27515	1.66752	0.499993	1.41126		0.733596	0.419192	1.50327	0.431995	0.83139	0.471836	0.535682	0.898045	0.857779	0.459541	0.637737	0.801655	0.620302	1.12884	2.46375	0.682496	0.505158	0.719428	0.266121	0.521103	0.896862	0.41127	0.775803	2.24375	0.697968	1.58302	0.494221	1.17072	1.07418	1.34648	0.828965	0.51027	0.554437	0.828161	1.11324	0.630585
p-values in paired t-test on log transformed RQ (base 2)				0.00193512	0.00249496			0.0626441	0.288325	0.0410811	0.0193657	0.720113		0.228516	0.035496	0.00145337	0.0283499	0.0993977	0.979649	0.10191	0.192836	0.711499	1.49027e-05	0.0427725	0.771745	0.15098	0.851063	0.00269926	0.0975059	0.0563344	0.0489583	0.00598583	0.0879388	0.192474	0.739512	0.0311509	0.00191763	0.208296	0.4095	0.0906116	0.572295	0.666119	0.583762	0.0889536	0.00563695	0.094056	0.189146	0.732686	0.287065
Melanochromis auratus
raw Cq values
		reference gene		chromatophore markers				pmel-related network genes						target genes and sdf1/fbxw4 related network genes
		rps11		ltk	slc24a5			pmel	rpe65a	bhlhe22	ets2	tel2		csf1r	igsf11	sdf1a	bnc2	kita	erbb3b	mitfa	mmp2	mmp14	fbwx4	ednrb1	tmem237b	ttc8	agpat3	xpnpep1	rnpc3	nub1	ift52	dhdh	etfdh	gpx1a	selenbp1	hsdl2	bckdhb	col14a1a	ifitm5
	Am_R1	24.9229		28.7008	32.3978			35.6902	36.06	36.6566	34.1035	33.9518		27.5633	29.6479	28.5888	29.5122	29.7013	31.7764	31.2015	26.5558	26.5627	28.4836	25.173	31.07	32.3629	29.5278	29.1849	29.6258	27.1878	30.7311	29.2929	27.0679	30.0923	29.8225	30.2362	30.0337	34.324	32.9942
	Am_R2	26.4911		29.8132	33.8296			36.7993	36.3945	38.2333	34.883	36.7335		28.0672	30.2837	31.7108	29.9752	30.5693	33.0977	32.221	27.7793	28.2582	29.6865	26.1549	33.6833	34.197	30.6489	29.7278	30.6243	28.3949	32.0931	30.2536	28.4443	32.0417	31.1016	31.6893	31.1477	35.3914	34.6818
	Am_R3	27.0346		30.0995	34.1371			37.3956	35.737	37.3665	36.7134	37.5356		28.8841	31.3517	34.0923	31.3237	30.3315	34.2594	32.6152	28.3308	28.0696	30.3988	27.1741	32.642	34.3006	31.1484	29.7503	30.3921	27.4695	31.9714	30.4229	28.7338	31.311	31.7936	32.3248	31.7043	34.6608	33.1347
	Am_R4	25.8402		28.851	33.3876			36.8616	36.4435	36.4555	34.6847	33.7863		28.1248	30.0254	32.2364	30.0302	30.1524	33.0564	32.4286	27.5723	27.3329	28.97	26.4559	31.0151	32.8627	30.3899	28.8262	29.4528	27.3253	30.7258	30.6933	28.2022	30.2725	30.0202	30.6796	30.1898	35.0071	33.2315
	Am_R5	26.0057		29.1216	33.3314			36.8667	36.2983	37.3176	35.3357	35.6414		28.5064	30.4929	32.2015	29.7215	30.4241	32.7698	32.4933	27.4518	27.7436	29.5243	25.962	32.4803	32.9975	30.2633	29.1169	29.6572	27.8276	30.9027	30.5333	28.2575	30.5851	30.85	31.5879	31.0132	34.9854	33.6501
	Pm_R1	24.8637		28.7064	32.5087			35.6902	36.434	36.0116	33.4558	35.2328		28.0639	30.2159	29.6596	29.4558	29.5048	32.8935	31.3137	27.1553	26.4137	29.1206	25.2516	31.0306	33.3969	30.3168	29.3703	29.8991	27.7585	30.6085	29.4242	27.4026	30.2821	30.3637	31.0187	30.6122	33.7653	33.9725
	Pm_R2	25.8715		29.1165	33.0866			36.8176	35.5664	36.9583	33.9252	33.8606		28.056	30.7465	29.5854	30.0602	30.7226	32.9708	32.111	27.0358	27.7112	29.893	26.1392	32.2759	34.7188	30.9609	29.6579	29.6712	28.2412	32.0476	29.4556	28.6047	30.6102	31.0833	31.4981	30.8309	34.4569	32.0676
	Pm_R3	26.191		29.3457	33.2951			36.321	36.3681	35.6442	35.214	34.5486		28.4838	30.7613	31.7671	30.2623	30.4482	32.6729	31.4884	28.1163	27.4818	30.2426	26.7636	32.4991	32.611	30.9378	29.1807	29.6468	27.202	31.4714	29.9203	28.9522	30.3616	30.6802	31.5197	30.9836	33.8163	33.8928
	Pm_R4	26.0163		28.955	33.3849			37.0418	36.4243	35.1428	33.4801	34.681		28.4562	30.4784	32.0025	29.7809	30.2487	33.7756	31.4096	27.9381	27.2701	30.2795	26.7682	31.3901	33.4148	31.292	28.945	29.1263	27.4821	30.718	30.7463	28.06	30.2032	29.7183	30.9392	30.62	33.9255	33.4863
	Pm_R5	25.9003		28.8875	33.1766			36.2321	36.3378	36.0788	33.8792	34.7203		28.0073	30.3129	30.6449	29.5393	30.0266	33.2021	31.4729	27.718	26.9194	30.0235	26.5083	32.1877	33.7007	31.0213	28.835	29.8524	27.2155	30.7446	30.2531	27.7994	30.8076	30.7069	31.0774	30.5952	34.1306	33.4944
RQ (target genes corrected for slc24a5 expression)
								pmel	rpe65a	bhlhe22	ets2	tel2		csf1r	igsf11	sdf1a	bnc2	kita	erbb3b	mitfa	mmp2	mmp14	fbwx4	ednrb1	tmem237b	ttc8	agpat3	xpnpep1	rnpc3	nub1	ift52	dhdh	etfdh	gpx1a	selenbp1	hsdl2	bckdhb	col14a1a	ifitm5
	Am_R1							1	1	1	1	1		1	1	1	1	1	1	1	1	1	1	1	1	1	1	1	1	1	1	1	1	1	1	1	1	1	1
	Am_R2							1.25067	2.13954	0.904455	1.57167	0.392319		1.9025	1.73628	0.309884	1.95727	1.47816	1.0796	1.33081	1.15533	0.832949	1.17194	1.36595	0.440893	0.756651	1.24031	1.85176	1.35032	1.16853	1.04957	1.38617	1.03915	0.698533	1.11165	0.985344	1.24643	1.28735	0.837523
	Am_R3							1.02378	4.17652	2.0413	0.546919	0.278452		1.33654	1.02491	0.0735975	0.951213	2.15711	0.597206	1.25319	0.975558	1.17479	0.885215	0.834047	1.12295	0.871517	1.08576	2.25621	1.96292	2.74651	1.41323	1.52552	1.05219	1.43455	0.851572	0.784965	1.04877	2.64359	3.02891
	Am_R4							0.881725	1.52235	2.28296	1.3274	2.22731		1.34565	1.52869	0.158461	1.38688	1.45266	0.817789	0.848331	0.981663	1.16441	1.41755	0.816146	2.06294	1.40444	1.09255	2.54647	2.23892	1.80538	1.99322	0.75231	0.904693	1.75273	1.73159	1.46044	1.78225	1.23688	1.68471
	Am_R5							0.845054	1.61915	1.20801	0.813005	0.59213		0.99341	1.06329	0.156139	1.65207	1.15729	0.959361	0.780135	1.02639	0.842449	0.928427	1.10542	0.71863	1.23026	1.14716	2.00218	1.86888	1.22584	1.69585	0.808431	0.837386	1.35731	0.936938	0.748408	0.968649	1.20761	1.21221
	Pm_R1							1.07987	0.833271	1.68868	1.6918	0.444378		0.763266	0.728428	0.514078	1.12295	1.23744	0.497841	0.99907	0.712696	1.19736	0.694409	1.02261	1.10977	0.527359	0.62497	0.949644	0.893511	0.727066	1.17565	0.985931	0.856282	0.946752	0.742086	0.627792	0.723146	1.59059	0.548118
	Pm_R2							0.737835	2.26949	1.30777	1.82395	1.7171		1.14557	0.752712	0.807856	1.10252	0.794143	0.704353	0.858131	1.1557	0.727122	0.606832	0.825059	0.698761	0.314879	0.596945	1.16132	1.56197	0.776668	0.647194	1.44	0.555543	1.12574	0.67267	0.672157	0.927597	1.47005	3.0639
	Pm_R3							1.20289	1.50441	3.75728	0.862622	1.23157		0.984048	0.86089	0.205755	1.10745	1.10988	1.00055	1.52668	0.631476	0.985003	0.550304	0.618438	0.691691	1.5683	0.700909	1.86801	1.83566	1.84433	1.11497	1.20572	0.504526	1.54542	1.02783	0.765142	0.964197	2.64818	0.999099
	Pm_R4							0.776738	1.53986	5.66054	3.05358	1.19574		1.06747	1.11466	0.186003	1.6454	1.35632	0.495824	1.71594	0.760384	1.21394	0.570856	0.65606	1.58777	0.956078	0.583543	2.3408	2.80228	1.61642	2.00028	0.723819	0.99654	1.83553	2.13066	1.21765	1.32024	2.61281	1.40932
	Pm_R5							1.17843	1.41519	2.5608	2.00428	1.00712		1.26119	1.08204	0.412571	1.68377	1.36933	0.638619	1.42145	0.766609	1.33984	0.590033	0.679962	0.79064	0.678755	0.609321	2.18662	1.46629	1.68309	1.6997	0.881808	1.03328	1.04498	0.92939	0.957638	1.16256	1.96182	1.21301
p-values in paired t-test on log transformed RQ (base 2)								0.914971	0.267518	0.00241423	0.0136665	0.450379		0.155089	0.0833292	0.211875	0.876585	0.361955	0.224385	0.36408	0.0220396	0.555813	0.00411441	0.037164	0.92102	0.208225	0.000454297	0.203979	0.90901	0.24841	0.38287	0.585789	0.270636	0.664825	0.583778	0.274254	0.165378	0.051755	0.783412
RQ (target genes corrected for mitfa expression)
								pmel	rpe65a	bhlhe22	ets2	tel2		csf1r	igsf11	sdf1a	bnc2	kita	erbb3b	mitfa	mmp2	mmp14	fbwx4	ednrb1	tmem237b	ttc8	agpat3	xpnpep1	rnpc3	nub1	ift52	dhdh	etfdh	gpx1a	selenbp1	hsdl2	bckdhb	col14a1a	ifitm5
	Am_R1							1	1	1	1	1		1	1	1	1	1	1		1	1	1	1	1	1	1	1	1	1	1	1	1	1	1	1	1	1	1
	Am_R2							0.939783	1.6077	0.679629	1.18099	0.294798		1.42959	1.30468	0.232854	1.47074	1.11072	0.81124		0.86814	0.625898	0.880625	1.0264	0.331298	0.568566	0.931999	1.39146	1.01466	0.878065	0.788673	1.0416	0.780841	0.524895	0.835319	0.740412	0.936597	0.967343	0.629335
	Am_R3							0.816939	3.33272	1.62889	0.436423	0.222195		1.06651	0.817845	0.0587283	0.759036	1.7213	0.47655		0.778463	0.937441	0.706372	0.665541	0.89608	0.695441	0.866397	1.80038	1.56634	2.19162	1.12771	1.21731	0.839615	1.14472	0.679526	0.626376	0.836884	2.1095	2.41697
	Am_R4							1.03936	1.79452	2.69111	1.56472	2.62551		1.58623	1.802	0.186791	1.63483	1.71238	0.963997		1.15717	1.37259	1.67099	0.962061	2.43176	1.65554	1.28788	3.00174	2.6392	2.12815	2.34958	0.886812	1.06644	2.06609	2.04118	1.72154	2.10089	1.45801	1.98591
	Am_R5							1.08322	2.07547	1.54847	1.04213	0.759009		1.27338	1.36296	0.200144	2.11767	1.48344	1.22974		1.31566	1.07988	1.19008	1.41696	0.921161	1.57698	1.47047	2.56645	2.39558	1.57132	2.17379	1.03627	1.07339	1.73984	1.20099	0.959331	1.24164	1.54796	1.55384
	Pm_R1							1.08088	0.834047	1.69025	1.69337	0.444791		0.763976	0.729106	0.514556	1.124	1.23859	0.498305		0.713359	1.19848	0.695055	1.02356	1.1108	0.52785	0.625551	0.950527	0.894343	0.727743	1.17674	0.986848	0.857079	0.947633	0.742776	0.628376	0.723819	1.59207	0.548628
	Pm_R2							0.859816	2.64469	1.52398	2.1255	2.00097		1.33496	0.877153	0.941413	1.2848	0.925433	0.820799		1.34677	0.847332	0.707156	0.961461	0.814282	0.366936	0.695634	1.35332	1.8202	0.905069	0.75419	1.67807	0.647387	1.31185	0.783877	0.78328	1.08095	1.71309	3.57044
	Pm_R3							0.787908	0.985413	2.46108	0.56503	0.806698		0.644566	0.563896	0.134773	0.725396	0.726986	0.655378		0.413626	0.645192	0.360457	0.405086	0.453068	1.02726	0.459106	1.22357	1.20239	1.20807	0.73032	0.789768	0.330472	1.01227	0.673243	0.50118	0.631564	1.7346	0.654425
	Pm_R4							0.45266	0.897386	3.2988	1.77953	0.69684		0.622092	0.649589	0.108397	0.958892	0.790425	0.288952		0.443129	0.70745	0.332678	0.382333	0.925304	0.557174	0.340071	1.36415	1.63309	0.942001	1.1657	0.42182	0.580754	1.0697	1.24169	0.709611	0.769397	1.52267	0.821311
	Pm_R5							0.829035	0.995594	1.80154	1.41003	0.708519		0.887253	0.761222	0.290247	1.18454	0.963333	0.449273		0.539315	0.942585	0.415092	0.478359	0.556221	0.477509	0.428662	1.5383	1.03155	1.18407	1.19575	0.620359	0.726922	0.735155	0.653833	0.673706	0.817868	1.38015	0.853362
p-values in paired t-test on log transformed RQ (base 2)								0.226415	0.185201	0.0238325	0.0135837	0.761347		0.0423024	0.0139673	0.520806	0.161953	0.107916	0.153842		0.133617	0.480262	0.0357069	0.0832686	0.527564	0.103656	0.018907	0.0699853	0.398864	0.0515221	0.121787	0.319283	0.0347088	0.640085	0.0653036	0.0729193	0.110249	0.375734	0.568301
RQ (target genes not corrected for slc24a5/mitfa expression)
				chromatophore markers
				ltk	slc24a5			pmel	rpe65a	bhlhe22	ets2	tel2		csf1r	igsf11	sdf1a	bnc2	kita	erbb3b	mitfa	mmp2	mmp14	fbwx4	ednrb1	tmem237b	ttc8	agpat3	xpnpep1	rnpc3	nub1	ift52	dhdh	etfdh	gpx1a	selenbp1	hsdl2	bckdhb	col14a1a	ifitm5
	Am_R1			1	1			1	1	1	1	1		1	1	1	1	1	1	1	1	1	1	1	1	1	1	1	1	1	1	1	1	1	1	1	1	1	1
	Am_R2			1.37156	1.09916			1.37468	2.35169	0.994139	1.72752	0.431221		2.09115	1.90845	0.340612	2.15135	1.62473	1.18665	1.46277	1.26989	0.915543	1.28815	1.50139	0.484611	0.83168	1.3633	2.03538	1.48421	1.2844	1.15365	1.52362	1.14219	0.767799	1.22188	1.08305	1.37002	1.415	0.92057
	Am_R3			1.63923	1.2945			1.32528	5.40652	2.64247	0.70799	0.360457		1.73015	1.32675	0.0952723	1.23135	2.79239	0.773086	1.62225	1.26286	1.52077	1.14591	1.07968	1.45367	1.12818	1.40552	2.92067	2.54101	3.55537	1.82944	1.97479	1.36207	1.85703	1.10236	1.01614	1.35764	3.42214	3.92094
	Am_R4			1.70187	0.950989			0.83851	1.44774	2.17107	1.26234	2.11814		1.27969	1.45377	0.150695	1.3189	1.38147	0.777708	0.806754	0.933551	1.10734	1.34807	0.776146	1.96183	1.33561	1.039	2.42167	2.12918	1.71689	1.89553	0.715439	0.860353	1.66682	1.64673	1.38886	1.6949	1.17625	1.60214
	Am_R5			1.58236	1.10902			0.937178	1.79566	1.33971	0.901634	0.656681		1.10171	1.17921	0.173161	1.83217	1.28345	1.06395	0.865182	1.13828	0.934288	1.02964	1.22593	0.796971	1.36437	1.27222	2.22045	2.07261	1.35948	1.88072	0.896562	0.928674	1.50528	1.03908	0.829995	1.07425	1.33926	1.34436
	Pm_R1			0.956118	0.888807			0.959796	0.740617	1.50091	1.50368	0.394966		0.678396	0.647432	0.456916	0.998089	1.09984	0.442485	0.887981	0.633449	1.06422	0.617196	0.908904	0.986369	0.468721	0.555477	0.84405	0.794159	0.646221	1.04493	0.876302	0.761069	0.841479	0.659571	0.557986	0.642737	1.41372	0.487171
	Pm_R2			1.44685	1.19734			0.883438	2.71735	1.56584	2.18389	2.05594		1.37164	0.90125	0.967276	1.32009	0.950857	0.843348	1.02747	1.38377	0.870611	0.726583	0.987875	0.836652	0.377017	0.714745	1.3905	1.87021	0.929934	0.77491	1.72417	0.665172	1.34789	0.805413	0.804799	1.11065	1.76015	3.66852
	Pm_R3			1.54031	1.29307			1.55542	1.94531	4.85843	1.11543	1.59251		1.27244	1.11319	0.266056	1.43201	1.43515	1.29379	1.97411	0.816543	1.27368	0.711581	0.799683	0.894405	2.02792	0.906325	2.41546	2.37364	2.38485	1.44173	1.55909	0.652387	1.99834	1.32905	0.989382	1.24677	3.42428	1.29191
	Pm_R4			1.78908	1.07646			0.83613	1.6576	6.09337	3.28707	1.28717		1.1491	1.19989	0.200226	1.77122	1.46003	0.533737	1.84715	0.818526	1.30677	0.614506	0.706225	1.70917	1.02918	0.628163	2.51978	3.01655	1.74002	2.15323	0.779165	1.07274	1.97589	2.29358	1.31076	1.42119	2.81259	1.51708
	Pm_R5			1.72995	1.14758			1.35235	1.62404	2.93873	2.30008	1.15576		1.44731	1.24173	0.473459	1.93226	1.57142	0.732868	1.63123	0.879747	1.53757	0.677111	0.780313	0.907324	0.778927	0.699246	2.50933	1.68269	1.93149	1.95054	1.01195	1.18578	1.19921	1.06655	1.09897	1.33413	2.25135	1.39203
p-values in paired t-test on log transformed RQ (base 2)				0.596649	0.58128			0.954221	0.347248	0.00460105	0.0152517	0.436383		0.211164	0.092484	0.220178	0.990131	0.396269	0.268711	0.344868	0.0767884	0.434389	0.00105442	0.0237309	0.965834	0.232795	0.000115419	0.264983	0.907524	0.350091	0.437797	0.922671	0.334112	0.596109	0.72727	0.397344	0.261629	0.0562369	0.83719
[truncated: 4 more columns]
